# Supplementary material for: Progressive transformation of the HIV-1 reservoir cell profile over two decades of antiviral therapy
Source: PubMed Central journal article supplement (PMC9839361; doi:10.1016/j.chom.2022.12.002), 2023-01-11
Supplement: mmc1.pdf [file mmc1.pdf]

**Supplemental information**

**Progressive transformation of the HIV-1 reservoir  
cell profile over two decades of antiviral therapy**

**Xiaodong Lian, Kyra W. Seiger, Elizabeth M. Parsons, Ce Gao, Weiwei Sun, Gregory T. Gladkov, Isabelle C. Roseto, Kevin B. Einkauff, Matthew R. Osborn, Joshua M. Chevalier, Chenyang Jiang, Jane Blackmer, Mary Carrington, Eric S. Rosenberg, Michael M. Lederman, Deborah K. McMahon, Ronald J. Bosch, Jeffrey M. Jacobson, Rajesh T. Gandhi, Michael J. Peluso, Tae-Wook Chun, Steven G. Deeks, Xu G. Yu, and Mathias Lichterfeld**

## Supplemental Materials for

### **Progressive transformation of the HIV-1 reservoir cell profile over two decades of antiviral therapy**

Xiaodong Lian, Kyra W. Seiger, Elizabeth M. Parsons, Ce Gao, Weiwei Sun, Gregory T. Gladkov, Isabelle C. Roseto, Kevin B. Einkauf, Matthew R. Osborn, Joshua M. Chevalier, Chenyang Jiang, Jane Blackmer, Mary Carrington, Eric S. Rosenberg, Michael M. Lederman, Deborah McMahon, Ronald J. Bosch, Jeffrey Jacobson, Rajesh T. Gandhi, Michael Peluso, Tae-Wook Chun, Steven G. Deeks, Xu G. Yu, Mathias Lichterfeld

Figure S1

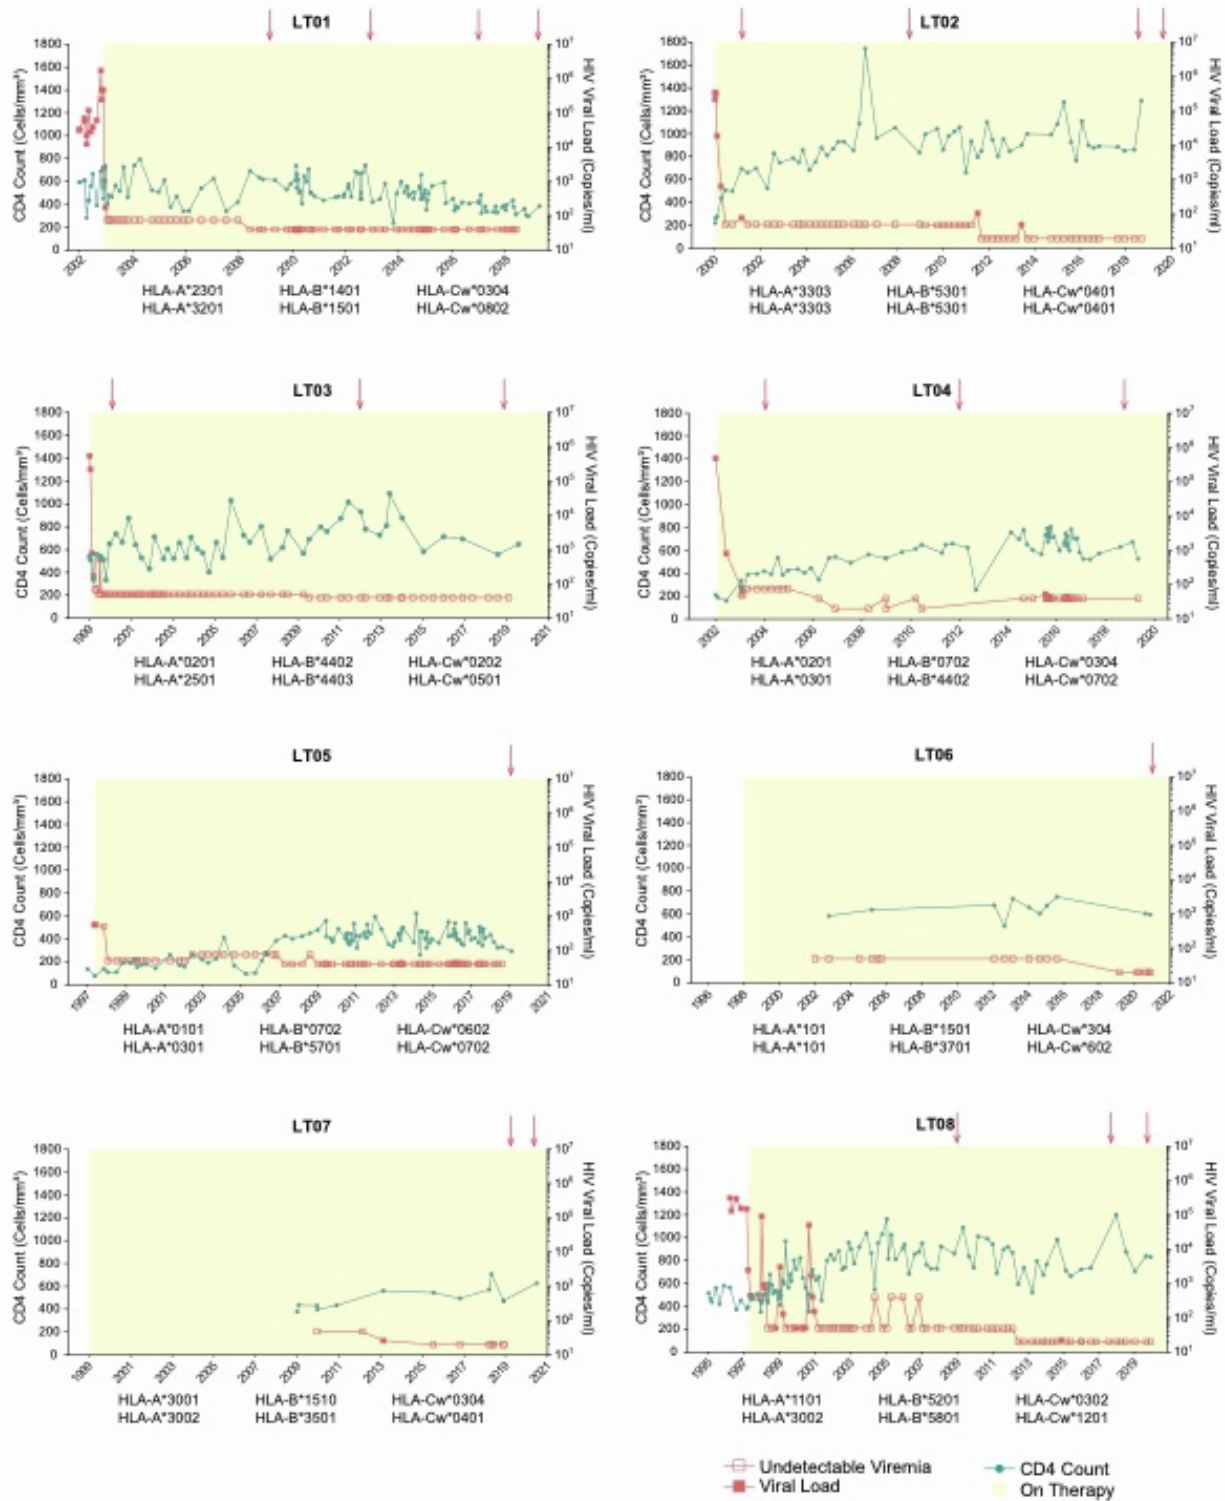

**Figure S1 (Related to Figure 1): Longitudinal viral loads and CD4 T cell counts in the eight study participants.** Timepoints of PBMC sampling are indicated by red arrows. HLA class I alleles are also listed. Duration of ART is indicated by yellow shading. For study participants LT06 and LT07, original viral load and CD4 T cell count data during early stages of ART could not be independently reviewed by study team; however, suppression of viremia during ART was confirmed through provider reports.

Figure S2

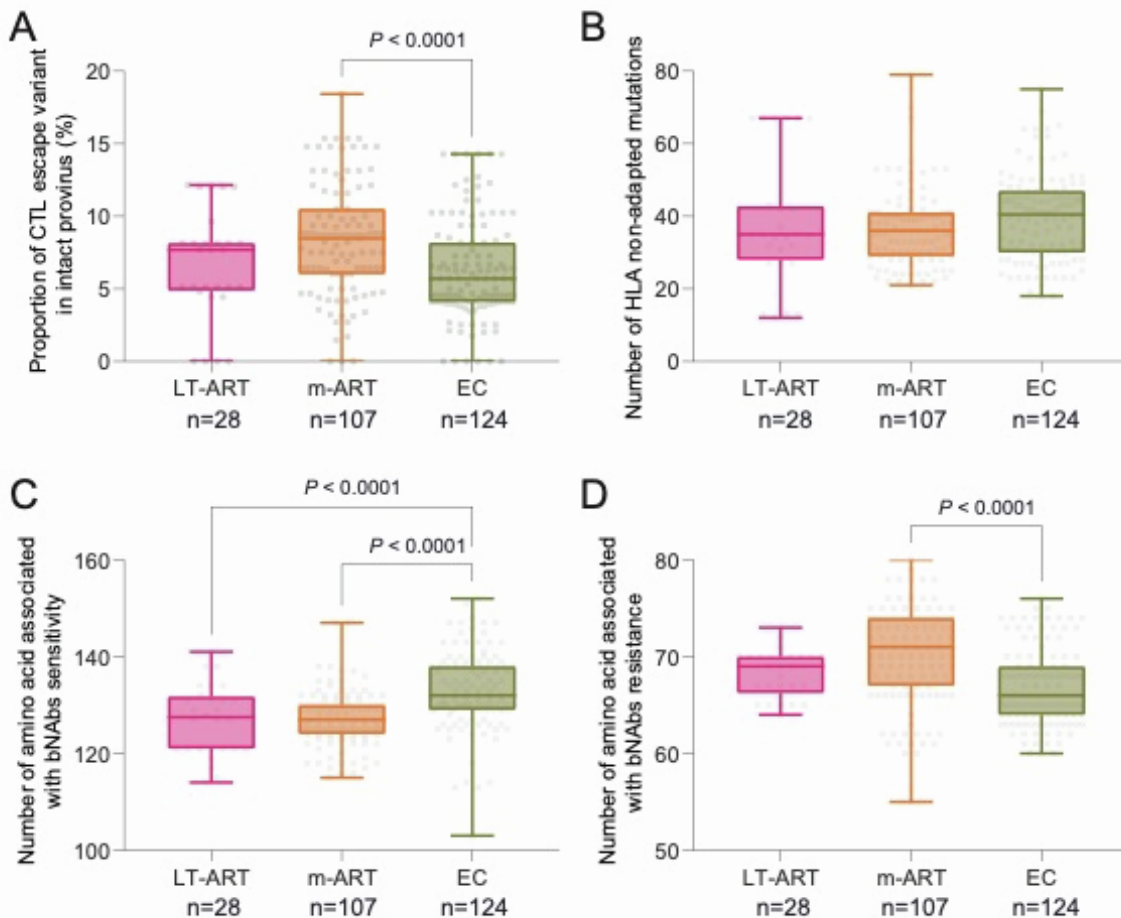

**Figure S2 (Related to Figure 1): Immune footprints in intact HIV-1 proviruses.** (A): Proportions of clade B CTL epitopes (restricted by autologous HLA class I alleles) within intact proviruses that harbor known escape variants. Defined escape mutations listed in the LANL HIV Immunology Database ([www.hiv.lanl.gov](http://www.hiv.lanl.gov)) were counted. (B): Numbers of sequence variations without statistically significant associations with autologous HLA class I alleles are shown, determined as described by Carlson et al [S1]. Each dot represents one intact provirus. (C-D): Numbers of amino acid residues associated with sensitivity (C) or resistance (D) to broadly-neutralizing antibodies, calculated as described by Bricault et al [S2]. (A-D): Each symbol represents one intact proviral sequence from indicated study cohort; all intact clade B sequences were included. Clonal sequences are shown once. P-values were calculated using FDR-adjusted two-sided Kruskal-Wallis nonparametric test.





**Figure S4 (Related to Figure 2): Chromatin environment of intact proviruses integrated in KRAB-ZNF genes, inferred from reference data.** Genome browser snapshots of chromosomal integration sites of intact proviruses located in ZNF genes are shown; ChIP-Seq tracks of the inhibitory histone markers H3K9me3, and the activating chromatin mark H3K4me3 from primary CD4 T cells evaluated in the ROADMAP consortium [S4] are included. ChIP-Seq tracks of H3K36me3 (associated with context-dependent transcriptional activation or repression [S5]), are also shown.



Figure S5

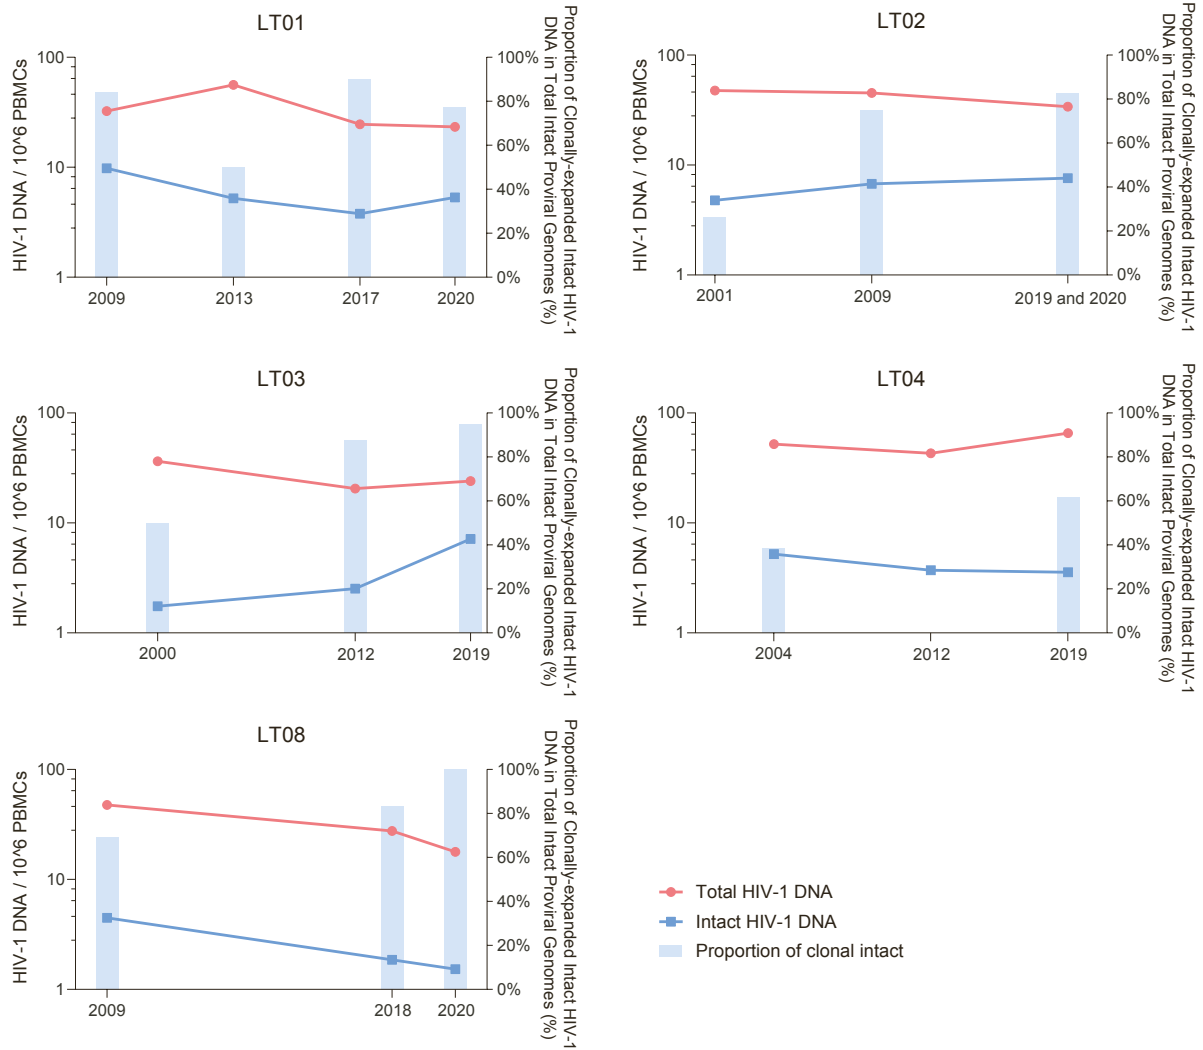

**Figure S5 (Related to Figure 4):** Frequencies of total and intact HIV-1 proviruses over time in the five longitudinally-followed study participants undergoing long-term ART. Proportions of clonal intact proviruses among all intact proviruses are also indicated.

Figure S6

A

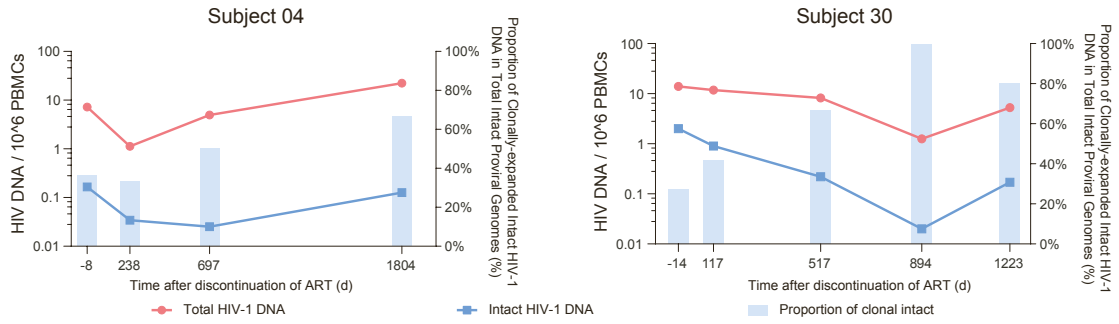

**Figure S6 (Related to Figure 6): Longitudinal frequencies of HIV-1 proviruses in study persons 04 and 30.** Longitudinal frequencies of total and intact HIV-1 proviruses in the 2 individuals with post-treatment control. Proportion of clonal intact proviruses among all intact proviruses is also indicated.

**Table S2 (Related to Figures 2 and 4):** Numbers of cells analyzed at each timepoint in indicated study participants.

| Study Participant No. | Time point    | Cells assayed |
|-----------------------|---------------|---------------|
| LT01                  | 2009          | 1.94E+06      |
|                       | 2013          | 1.53E+06      |
|                       | 2017          | 2.64E+06      |
|                       | 2020          | 6.57E+06      |
| LT02                  | 2001          | 3.98E+06      |
|                       | 2009          | 1.78E+06      |
|                       | 2019          | 2.57E+06      |
|                       | 2020          | 1.15E+06      |
| LT03                  | 2000          | 2.82E+06      |
|                       | 2012          | 3.50E+06      |
|                       | 2019          | 2.66E+06      |
| LT04                  | 2004          | 1.15E+06      |
|                       | 2012          | 1.65E+06      |
|                       | 2019          | 3.64E+06      |
| LT05                  | 2019          | 8.06E+06      |
| LT06                  | 2021          | 1.27E+07      |
| LT07                  | 2019          | 8.01E+06      |
| LT08                  | 2009          | 4.85E+05      |
|                       | 2018          | 5.37E+06      |
|                       | 2020          | 2.62E+06      |
| subject 04            | on ART        | 1.66E+07      |
|                       | d238 off ART  | 2.55E+07      |
|                       | d697 off ART  | 2.43E+07      |
|                       | d1804         | 3.61E+07      |
| subject 30            | on ART        | 6.60E+06      |
|                       | d117 off ART  | 3.21E+06      |
|                       | d517 off ART  | 5.75E+06      |
|                       | d894 off ART  | 1.03E+07      |
|                       | d1223 off ART | 6.09E+06      |
| subject 01            | on ART        | 2.66E+07      |
| subject 22            | on ART        | 1.43E+06      |
| subject 25            | on ART        | 5.98E+06      |

**Table S3 (Related to STAR Methods):** Numbers of cells analyzed in quantitative viral outgrowth assays.

| Study Participant | CD4 cells assayed | Estimated minimum number of intact proviruses based on FLIP-Seq results | Luciferase-positive wells after 21 days of culture |
|-------------------|-------------------|-------------------------------------------------------------------------|----------------------------------------------------|
| LT02              | 2.51E+06          | 42                                                                      | 1                                                  |
| LT03              | 1.93E+06          | 119                                                                     | 1                                                  |
| LT06              | 4.08E+06          | 20                                                                      | 0                                                  |
| LT07              | 1.62E+06          | 62                                                                      | 0                                                  |
| LT08              | 5.55E+06          | 64                                                                      | 0                                                  |

**Table S4 (Related to STAR Methods): List of Primers/Probes**

| Workflow                | Amplicon/ Target (HXB2 Coordinates) | Round/ Orientation | Oligo Name                             | Oligo Sequence (5'->3')                                               |
|-------------------------|-------------------------------------|--------------------|----------------------------------------|-----------------------------------------------------------------------|
| gDNA ddPCR              | LTRgag (HXB2 684-810)               |                    | LTRgag F                               | TCTCGACGCAGGACTCG                                                     |
|                         |                                     |                    | LTRgag R                               | TACTGACGCTCTCGACC                                                     |
|                         |                                     |                    | LTRgag P                               | /56-FAM/CTCTCTCTCT/ZEN/TCTAGCCTC/31ABkFQ/                             |
|                         | RPP30                               |                    | RPP30 F                                | GATTTGGACCTGCGAGCG                                                    |
|                         |                                     |                    | RPP30 R                                | GCGGCTGTCTCCACAAGT                                                    |
|                         |                                     | RPP30 P            | /56-FAM/CTGACCTGA/ZEN/AGGCTCT/31ABkFQ/ |                                                                       |
| Proviral DNA Sequencing | Near full-length (638-9632)         | 1F                 | U5-623F                                | AAATCTCTAGCAGTGGCGCCCCGAACAG                                          |
|                         |                                     | 1R                 | U5-601R                                | TGAGGGATCTCTAGTTACCAGAGTC                                             |
|                         |                                     | 2F                 | U5-638F                                | GCGCCCCGAACAGGGACYTGAAARCGAAAG                                        |
|                         |                                     | 2R                 | U5-547R                                | GCACTCAAGGCAAGCTTTATTGAGGCTTA                                         |
|                         | Promoter (76-818)                   | 1F                 | 24F                                    | CGAAGACAAGATATCCTTGATCTGTGG                                           |
|                         |                                     | 1R                 | 962R                                   | CTACAGCCTTCTGATGTTTCTAACAGG                                           |
|                         |                                     | 2F                 | 76F                                    | CTGATTAGCAGAACTACACACCAGG                                             |
|                         |                                     | 2R                 | 818R                                   | CCGCTTAATACTGACGCTCTCG                                                |
|                         | Promoter (367-643)                  | 1F                 | 350F                                   | GGGACTTCCACTGGGGACTTTC                                                |
|                         |                                     | 1R                 | 661R                                   | GCTTTCAGGTCCCTGTTTCGG                                                 |
|                         |                                     | 2F                 | 367F                                   | ACTTTCAGGGAGGCGTGG                                                    |
|                         |                                     | 2R                 | Kumar R                                | GGGCGCCACTGCTAGAGA                                                    |
|                         | A1mod2 (638-2724)                   | 1F                 | U5-623F                                | AAATCTCTAGCAGTGGCGCCCCGAACAG                                          |
|                         |                                     | 1R                 | NE1                                    | CCACTAACTTCTGTATGTCATTGACAGTCCAGCT                                    |
|                         |                                     | 2F                 | U5-638F                                | GCGCCCCGAACAGGGACYTGAAARCGAAAG                                        |
|                         |                                     | 2R                 | ProC-                                  | GAGTATTGTATGGATTTTCAGGCCCAAT                                          |
|                         | Pol (2011-3798)                     | 1F                 | 5CP1                                   | GAAGGGCACACAGCCAGAAATTGCAGGG                                          |
|                         |                                     | 1R                 | RT3.1                                  | GCTCCTACTATGGGTTCTTCTCTAACTGG                                         |
|                         |                                     | 2F                 | 2.5                                    | CCTAGGAAAAAGGGCTGTTGGAAATGTGG                                         |
|                         |                                     | 2R                 | RT3798R                                | CAAACCTCCCACTCAGGAATCCA                                               |
|                         | C (3626-5980)                       | 1F                 | RT3597mixF                             | AAAACAGGAAARTATGCAA                                                   |
|                         |                                     | 1R                 | SC05R                                  | AGCTCTTCGTCGCTGTCTCCGCTT                                              |
|                         |                                     | 2F                 | RT3626F                                | TGCCACACTAATGATGTAA                                                   |
|                         |                                     | 2R                 | SC02R                                  | CTTCTGCCATAGGAGATGCCTA                                                |
|                         | A2 (5550-7760)                      | 1F                 | VP5450F                                | CAGGACATAACAAGGTAGGATC                                                |
|                         |                                     | 1R                 | CO602                                  | GCCCATAGTGCTTCTGCTGCTCCCAAGAACC                                       |
|                         |                                     | 2F                 | VP5549F                                | AGAGGATAGATGGAACAAGCCCCAG                                             |
|                         |                                     | 2R                 | V3CR                                   | TGCTCTTTTTCTCTCTSCACCACT                                              |
|                         | B2 (7652-9610)                      | 1F                 | GP41Fo                                 | TTCAGACCTGGAGGAGGAGATAT                                               |
|                         |                                     | 1R                 | 3LTRi                                  | TCAAGGCAAGCTTTATTGAGGCTTAA                                            |
|                         | 2F                                  | GP41Fi             | GGACAATTGGAGAAGTGAATTAT                |                                                                       |
|                         | 2R                                  | 3UTRi              | AGGCTTAAGCAGTGGGTTCCCTAG               |                                                                       |
| Reverse Transcription   | Long LTR (643)                      | RT                 | Bio Long LTR                           | /5BiotinTEG/AAGCAGTGGTATCAACGCAGAGTACGGGC GCCACTGCTAGAGA              |
|                         | Pol (2662)                          | RT                 | Bio Pol                                | /5BiotinTEG/AAGCAGTGGTATCAACGCAGAGTACCAAAT TTCTACTAATGCTTTTATTTTTTC   |
|                         | Nef (9040)                          | RT                 | Bio Nef                                | /5BiotinTEG/AAGCAGTGGTATCAACGCAGAGTACTGTAA GTCATTGGTCTTAAAGGTACCTGAGG |
|                         | PolyA (9635+25)                     | RT                 | Bio PolyA                              | /5BiotinTEG/AAGCAGTGGTATCAACGCAGAGTACTTTTT TTTTTTTTTTTTTTTTTTTGAAG    |
|                         | Tat-Rev (8459)                      | RT                 | Bio Tat-Rev                            | /5BiotinTEG/AAGCAGTGGTATCAACGCAGAGTACGGATC TGCTCTGTCTCTCTCCACC        |
|                         | Read-through (582; 9667)            | RT                 | Bio Readth                             | /5BiotinTEG/AAGCAGTGGTATCAACGCAGAGTACAGAGT CACACAACAGACGG             |
| cDNA Amplification      | NA                                  | NA                 | Template-switching oligo (TSO)         | AAGCAGTGGTATCAACGCAGAGTACATrGrG+G-3                                   |

|            |                      |               |           |                                                  |
|------------|----------------------|---------------|-----------|--------------------------------------------------|
|            | NA                   | NA            | ISPCR     | AAGCAGTGGTATCAACGCAGAGT                          |
| cDNA ddPCR | Long LTR (522-643)   | F             | Kumar F   | GCCTCAATAAAGCTTGCCTTGA                           |
|            |                      | R             | Kumar R   | GGGCGCCACTGCTAGAGA                               |
|            |                      | R (alternate) | 625R      | TTTTCCACACTGACTAAAAGGTC                          |
|            |                      | Probe         | Kumar P   | /56-FAM/CCAGAGTCA/ZEN/CACAACAGACGGGCACA/3IABkFQ/ |
|            | Pol (2536-2662)      | F             | Pol mf299 | GCACTTTAAATTTCCCATTAGTCCTA                       |
|            |                      | R             | Pol mf1   | CAAATTTCTACTAATGCTTTTATTTTTTC                    |
|            |                      | Probe         | Pol P     | /56-FAM/AAGCCAGGA/ZEN/ATGGATGGCC/3IABkFQ/        |
|            | Nef (8883-9040)      | F             | F8883-03  | GGTGGGAGCAGYATCTCGAGA                            |
|            |                      | R             | R9040-10  | TGTAAGTCATTGGTCTTAAAGGTACCTGAGG                  |
|            |                      | Probe         | P8967-50  | /56-FAM/CCAGGCACA/ZEN/AKCAGCATT/3IABkFQ/         |
|            | PolyA (9496-9635+25) | F             | Freadth-2 | GCCCTCAGATGCTRCATATAA                            |
|            |                      | R             | 5T25      | TTTTTTTTTTTTTTTTTTTTTTTTTTGAAG                   |
|            |                      | Probe         | Preadth-1 | /56-FAM/TGCCTGTAC/ZEN/TGGGTCTCTCTGGTTAG/3IABkFQ/ |
|            | Tat-Rev (5956-8459)  | F             | mf1       | CTTAGGCATCTCCTATGGCAGGAA                         |

### Supplemental Reference List

- [S1] Carlson, J.M., Brumme, C.J., Martin, E., Listgarten, J., Brockman, M.A., Le, A.Q., Chui, C.K., Cotton, L.A., Knapp, D.J., Riddler, S.A., et al. (2012). Correlates of protective cellular immunity revealed by analysis of population-level immune escape pathways in HIV-1. *J Virol* 86, 13202-13216. 10.1128/JVI.01998-12.
- [S2] Bricault, C.A., Yusim, K., Seaman, M.S., Yoon, H., Theiler, J., Giorgi, E.E., Wagh, K., Theiler, M., Hraber, P., Macke, J.P., et al. (2019). HIV-1 Neutralizing Antibody Signatures and Application to Epitope-Targeted Vaccine Design. *Cell Host Microbe* 26, 296. 10.1016/j.chom.2019.07.016.
- [S3] Wagner, T.A., McLaughlin, S., Garg, K., Cheung, C.Y., Larsen, B.B., Styrchak, S., Huang, H.C., Edlefsen, P.T., Mullins, J.I., and Frenkel, L.M. (2014). HIV latency. Proliferation of cells with HIV integrated into cancer genes contributes to persistent infection. *Science* 345, 570-573. 10.1126/science.1256304.
- [S4] Roadmap Epigenomics, C., Kundaje, A., Meuleman, W., Ernst, J., Bilenky, M., Yen, A., Heravi-Moussavi, A., Kheradpour, P., Zhang, Z., Wang, J., et al. (2015). Integrative analysis of 111 reference human epigenomes. *Nature* 518, 317-330. 10.1038/nature14248.
- [S5] Wagner, E.J., and Carpenter, P.B. (2012). Understanding the language of Lys36 methylation at histone H3. *Nat Rev Mol Cell Biol* 13, 115-126. 10.1038/nrm3274.
